# Supplementary material
Source: Research Square preprint supplement (doi:10.21203/rs.3.rs-9856113/v1)
Supplement: Supplementary file 1 [file 22dde3786b05ba6088962135.xlsx]

## Sheet: Sheet1
	Supplementary Table 2. Primers used in this study
	Primer name	Primer sequences 5'-3'
	CRISPR/Cas9-mediated mutagenesis
	PtMED31-dual-sgRNA-F	AGGTCTCGTCGAGTTTTCCGGCAAAGGATTCGTGTTTTAGAGCTAGAAAT
	PtMED31-dual-sgRNA-R	GGGTCTCCAAACTCCAACAGTATCTTCGCTATCTCGACTTTGAAGGTGTT
	PtTMEL1- dual-sgRNA-F	AGGTCTCGTCGAGATGCCGCCACACAAACACGAGTTTTAGAGCTAGAAAT
	PtTMEL1- dual-sgRNA-R	GGGTCTCCAAACTGGAGGTTATTTGGATCAAGCTCGACTTTGAAGGTGTT
	PtTMEL1-sgRNA-F	TCGAGTTCGAAGGGATTATCGACAA
	PtTMEL1-sgRNA-R	AAACTTGTCGATAATCCCTTCGAAC
	PtMED6-sgRNA-F	TCGAGTCTACGAAGGATGCCGTCT
	PtMED6-sgRNA-R	AAACAGACGGCATCCTTCGTAGAC
	PtMED10-sgRNA-F	TCGAGCGAAGCGGAAAAGAATTTGC
	PtMED10-sgRNA-R	AAACGCAAATTCTTTTCCGCTTCGC
	PtMED17-sgRNA-F	TCGAGCGACTGCTGCAATGGTGACG
	PtMED17-sgRNA-R	AAACCGTCACCATTGCAGCAGTCGC
	PtMED21-sgRNA-F	TCGAGTCAATATTAGTTGCAATTGG
	PtMED21-sgRNA-R	AAACCCAATTGCAACTAATATTGAC
	PtMED4-dual-sgRNA-F	AGGTCTCGTCGAGTAGTAAGTCCATCTCAACAGTTTTAGAGCTAGAAAT
	PtMED4-dual-sgRNA-R	GGGTCTCCAAACTGCGCATCGTCGCCGTTAGACTCGACTTTGAAGGTGTT
	PtMED14-dual-sgRNA-F	AGGTCTCGTCGAGCGAGCAGTACTGAGCTGAGGTTTTAGAGCTAGAAAT
	PtMED14-dual-sgRNA-R	GGGTCTCCAAACTGTGCCATGTTGTACAAATCTCGACTTTGAAGGTGTT
	PtMED15-dual-sgRNA-F	AGGTCTCGTCGAGTCATTGCCGGGAGAAGCCGGTTTTAGAGCTAGAAAT
	PtMED15-dual-sgRNA-R	GGGTCTCCAAACTTGCGATAGGATTGCTGGACTCGACTTTGAAGGTGTT
	PtMED18-dual-sgRNA-F	AGGTCTCGTCGAGAGCATTCATGCTTCCAGCATGTTTTAGAGCTAGAAAT
	PtMED18-dual-sgRNA-R	GGGTCTCCAAACTGGATGCCATGTATTTTGCCTCGACTTTGAAGGTGTT
	PtMED20-dual-sgRNA-F	AGGTCTCGTCGAGAGGAATCCTACATAGCACAGGTTTTAGAGCTAGAAAT
	PtMED20-dual-sgRNA-R	GGGTCTCCAAACCGAGGGCGGTGCGAAAGCACTCGACTTTGAAGGTGTT
	PtMED22-dual-sgRNA-F	AGGTCTCGTCGAGCGTTGCGTCTTCGACTGCCGTTTTAGAGCTAGAAAT
	PtMED22-dual-sgRNA-R	GGGTCTCCAAACACTTTAGTAGATTTGAGTATCTCGACTTTGAAGGTGTT
	TpTMEL1-sgRNA-F	TCGAGACAACTGGTACAATCAGTGA
	TpTMEL1-sgRNA-R	AAACTCACTGATTGTACCAGTTGTC
	TpMED31-sgRNA-F	TCGAGCTCAAACCGATTCGCGGGG
	TpMED31-sgRNA-R	AAACCCCCGCGAATCGGTTTGAGC
	Primers for RT-qPCR
	PtPSY1-F	GTCTATGTTTGGTGTCGACGAA
	PtPSY1-R	AAGCACAGGTCAAAGACATCCT
	PtPDS1-F	TTATCAGCATGGCCAAGGCA
	PtPDS1-R	AACGACCTTTTCTCCGGACC
	PtCRTISO5-F	GAGGATCGGCTCATACATTCTC
	PtCRTISO5-R	GCATCTCTTCTTCCAGGACATC
	PtDXS-F	GCCTTTAATGACGGTCCTACTG
	PtDXS-R	AATTTCGTCACCCTCGAAAGTA
	PtPDS-like1-F	TCGGGTCTCAAGTCTCGAGTAT
	PtPDS-like1-R	AGGAAAGAGCCAAGATAGCACC
	PtZDS-F	ACAGCTTGGAGTGGAAGACAAA
	PtZDS1-R	CTCGCGAACCATATCCATACCA
	PtZDS-like-F	GCAGCGTCTTGACATGAAAAGT
	PtZDS-like-R	GTTTTAACGGCCACCCTTTACC
	PtCRTISO4-F	GACCGATCATCTGGACGCTTTA
	PtCRTISO4-R	CCGGCATGAATGTGGATGAAAG
	PtZEP3-F	GTGGACTGATCGTTTCTCTGGT
	PtZEP3-R	CTTGAATGGCGGCAGAAATACC
	PtVDL1-F	TGCCTTTAGATTGCACGGGTAT
	PtVDL1-R	AGAAGAGGAAGTTATGCCGTGG
	PtVDL2-F	CCGTTACCAATCAGCTACGC
	PtVDL2-R	CTTGTGTTGTGCCCTTGTGA
	PtZEP1-F	GGTACGCTTCGATACCCTACAG
	PtZEP1-R	GTAATTGGCAATACGGGACTTG
	PtActin-F	AGGCAAAGCGTGGTGTTCTTA
	PtActin-R	TCTGGGGAGCCTCAGTCAATA
	PtMED31-F	CGAGCTGGAACTGGAATTCG
	PtMED31-R	CGGCTCCACGTATCGAAAAG
	PtTMEL1-F	GGCAACAACAACAACAACGG
	PtTMEL1-R	TGACGTGGTGATAGGATCGG
	TpPSY1-F	AGGATGCTGAGAAACGCGAA
	TpPSY1-R	CTCTCAGAGCACGAGCGTAG
	TpPDS1-F	GCCTTCTCCATAACGCACCT
	TpPDS1-R	ACTCAACTCTTTCGCTTCTCTGA
	TpCRTISO5-F	AAACCATGCCGGTCAAAACG
	TpCRTISO5-R	TCCCGCATCTTGCCTCAAAT
	TpActin-F	CCTCGATTCGGGAGATGGTG
	TpActin-R	ATCAGGGAGCTCGAAGGACT
	Primers for ChIP PCR
	PtPSY1-A-F	CCAAAGCGTCGGACTAAGCA
	PtPSY1-A-R	TCACATGTCCGTTTGCTCCA
	PtPSY1-B-F	GGGATGAGCAGGGGTGAAAA
	PtPSY1-B-R	TCTTCATGCTTAACCACAGCA
	PtPSY1-C-F	TTGACATGGTCTGAGCACCC
	PtPSY1-C-R	TGGATGGACGCTCTCGAAAT
	PtPSY1-D-F	GCAGTAAGCGCAGATTGTCG
	PtPSY1-D-R	AGTTCTTTCGGTTGCCGGAT
	PtPDS1-A-F	AGCCGAGACGTGTGTATGTG
	PtPDS1-A-R	AACGTTGTGCGTTGACTGTG
	PtPDS1-B-F	CCCGCATCAGGGTAACATCA
	PtPDS1-B-R	AGTCACTCGCCGATTTTGGT
	PtPDS1-C-F	CGACGCCCACTGGATTTTTC
	PtPDS1-C-R	GCTTGTGGACAGACGGATCT
	PtPDS1-D-F	GTACGTTCGGTACACAGCCA
	PtPDS1-D-R	CCCGTCACGGAAGGAAAAGA
	PtCRTISO5-A-F	AAGCCCGGGAGTACCAAAAG
	PtCRTISO5-A-R	CGACCTTCCGCGTCCATTAT
	PtCRTISO5-B-F	TGAGAGAATGCAGCCAGGTG
	PtCRTISO5-B-R	ATTTCCGCAAGGCTGTACCA
	PtCRTISO5-C-F	TCGCATGTCACGGTCTAACT
	PtCRTISO5-C-R	ATTCCTTGCTCGTGTGTCGT
	PtCRTISO5-D-F	TTGCTGCTTTATTCGCTGCC
	PtCRTISO5-D-R	TTTTCCGTCTGGGCCACATT
	Primers for vector construction
	PtMED31-BD-F	ATGGCCATGGAGGCCGAATTCATGTCGGAAGGGGAACCG
	PtMED31-BD-R	TCGACGGATCCCCGGGAATTCTCAATTGTTCACCGCCGACT
	PtMYB2R1-AD-F	GCCATGGAGGCCAGTGAATTCATGTGGACCAAGGAAGAAGACG
	PtMYB2R1-AD-R	ATGCCCACCCGGGTGGAATTCTCATTCACGTTCGTACTGTCGG
	PtMED31-AD-F	GCCATGGAGGCCAGTGAATTCATGTCGGAAGGGGAACCG
	PtMED31-AD-R	ATGCCCACCCGGGTGGAATTCTCAATTGTTCACCGCCGACT
	PtTMEL1-BD-F	ATGGCCATGGAGGCCGAATTCATGAATGCCGCCACACAAA
	PtTMEL1-BD-R	TCGACGGATCCCCGGGAATTCCTAGGCGCTGGCCGAATG
	PtMED31-GFP-F	GACTAATTCGAGCTCGGTACCATGTCGGAAGGGGAACCG
	PtMED31-GFP-R	GCTCACCATGTCGACTCTAGAATTGTTCACCGCCGACTCTTC
	GST-PtMED31-F	ATCTGGTTCCGCGTGGATCCATGTCGGAAGGGGAACCGAC
	GST-PtMED31-R	TCACGATGCGGCCGCTCGAGTCAATTGTTCACCGCCGACTC
	His-Trx-PtTMEL1-F	CCATGGCTGATATCGGATCCATGAATGCCGCCACACAAAC
	His-Trx-PtTMEL1-R	TGGTGGTGGTGGTGCTCGAGCTAGGCGCTGGCCGAATG
	pPhaT1-Backbone-F	ACATACCTTCAGCGTCGTCTTC
	pPhaT1-Backbone-R	GGGGGATCTGGTTCTATAGTGTCA
	PtMED31-Comp--F	ACTATAGAACCAGATCCCCCACTTCGATTGTTTAAAATTTCCAAGCTC
	PtMED31-Comp--R	AGACGACGCTGAAGGTATGTAGTGTTGAGAGAGCACGCTT
	mgRNA1-PtMED31-F	AAACCCCTTGCCGGAAAACCGGTTC
	mgRNA1-PtMED31-R	TTTCCGGCAAGGGGTTTGTCGGCGCCAAGGGCTTG
	mgRNA2-PtMED31-F	GCAAGATTCTTCTTTCCAACAGTATCTTCGCTATCTTTT
	mgRNA2-PtMED31-R	GGAAAGAAGAATCTTGCAGAAAAAGCTTG
	PtTMEL1-Comp--F	ACTATAGAACCAGATCCCCCGGTTTGCCCAGCATTGCATTCCAG
	PtTMEL1-Comp--R	AGACGACGCTGAAGGTATGTTCGCAGAAAGTTTGATTTGAGTCTTCGC
	mgRNA1- PtTMEL1-F	ACACAGACGCGGTGGCAGTCGTTTCGAAGGG
	mgRNA1- PtTMEL1-R	TGCCACCGCGTCTGTGTGGCGGCATTCATGG
	mgRNA2- PtTMEL1-F	GCTTCGCGGAGGTTATTTGGATCAAGAAGTCG
	mgRNA2- PtTMEL1-R	AAATAACCTCCGCGAAGCGAGACTTTCGCTATATCGTC
	TpMED31-Comp--F	TCGAGGTCGACGGTATCGATCAGTTTACCCACATCTCTTCCCGA
	TpMED31-Comp--R	GCTCTAGAACTAGTGGATCCAGTATATTAAGCGCTTCCTGCAAACGAT
	mgRNA-TpMED31-F	ACACCAGTGTTGCTCTTCCCGCGAATCGGTTTGAG
	mgRNA-TpMED31-R	GAAGAGCAACACTGGTGTCGTTTGCGTCGTTTG
	TpTMEL1-Comp--F	TCGAGGTCGACGGTATCGATCATTTTGTTTGATGATTGCCGTTGTGTTTGAGATG
	TpTMEL1-Comp--R	GCTCTAGAACTAGTGGATCCTCTTCACTTTCAACTGCAAGATCTTCCCAAGC
	mgRNA1- TpTMEL1-F	TGGTACGATTAGCGAGGGTTTGTATCACGATAGTGTCA
	mgRNA1- TpTMEL1-R	CCTCGCTAATCGTACCAGTTGTATTGTTCGATGCTTT
