# Supplementary material
Source: Research Square preprint supplement (doi:10.21203/rs.3.rs-9856113/v1)
Supplement: Supplementary file 2 [file 69231e0510df3f76234d83eb.xlsx]

## Sheet: Sheet1
Supplementary Table 1. Identification of PtMED31-interacting proteins via yeast two-hybrid library screening
Accession Number	Protein Name	Protein Description
XP_002177917.1	AtpD	FoF1-type ATP synthase, beta subunit
XP_002181609.1	AdoMet_MTases	S-adenosylmethionine-dependent methyltransferase activity
XP_002183877.1	PtTMEL1	E3 ubiquitin ligase
XP_002177054.1	AroA	3-deoxy-7-phosphoheptulonate synthase
XP_002180158.1	SAP domain-containing predicted protein	Predicted nuclear protein potentially involved in DNA/chromatin-associated regulation, transcriptional regulation or RNA processing
XP_002180059.1	CAK2	homolog CDK7 CTD kinase activity Form active kinase complexes with cyc H Phosphorylate preferentially CDK in G1
XP_002179052.1	eRF3	eukaryotic release factor 3
XP_002176747.1	DRG2	GTP-binding protein
XP_002185743.1	HSP20	small heat shock protein
XP_002186155.1	S18	Mitochondrial/chloroplast ribosomal protein S18
XP_002181674.1	PtMYB2R1	Myb-like transcription factor
XP_002185143.1	maiA	maleylacetoacetate isomerase
XP_002185721.1	ASS	Argininosuccinate synthetase
